# Supplementary material for: A Walk on the Wild Side: Genome Editing of Tuber-Bearing Solanum bulbocastanum
Source: MDPI journal article supplement (doi:10.3390/plants13071044), 2024-04-08

## Supplementary material

**S1.** Sequence of the cDNA of the gene of interest with the sgRNA target sequences depicted.

**S2.** Sequence of sgRNA used and the primers.

| sgRNA                 |                          |                                                                 |                      |               |                  |
|-----------------------|--------------------------|-----------------------------------------------------------------|----------------------|---------------|------------------|
| Name                  | Position                 | Strand                                                          | Sequence             | PAM           | Efficiency Score |
| sgRNA1                | 114                      | 1                                                               | ATTAAAAGTAGAAAAAAGGG | TGG           | 54.67            |
| sgRNA3                | 289                      | -1                                                              | GCAACAACAGCTCCAACAAT | AGG           | 42.47            |
| sgRNA4                | 498                      | 1                                                               | TCGTTTCTGCTCTTGTCAAT | TGG           | 27.15            |
| sgRNA5                | 896                      | 1                                                               | TTCAGGACCTCAAGTGCCAA | CGG           | 43.81            |
| Primers used for IDAA |                          |                                                                 |                      |               |                  |
| Name                  | Type                     | Sequence                                                        |                      | Concentration |                  |
| FAM                   | Universal FAM            | 5'-6-FAM-AGC TGA CCG GCA GCA<br>AAA TTG-3'                      |                      | 0.25 µM       |                  |
| Trans22_F_1           | For-extension<br>forward | 5' AGC TGA CCG GCA GCA AAA TTG<br>GCA AGA GAT GGC GGA GTA TC 3' |                      | 0.025 µM      |                  |
| Trans22_R_2           | Reverse                  | 5' TGA AGA TGG AAC CAA GGC CA<br>3'                             |                      | 0.25 µM       |                  |

**S3.** Alignment of the mutated alleles with coding sequences (**A**) and predicted amino acid sequences (**B**). Red amino acids indicate change in reading frame.

**S4. Media and Stock solutions recipes modified from Nicolia et al.(2015)**

|                       |                |
|-----------------------|----------------|
| <b>Medium PPM</b>     | <b>1 liter</b> |
| MS Salts + vitamins   | 4.3 g          |
| Sucrose               | 20 g           |
| Kinetin (10 mM stock) | 100 µl         |
| Agar                  | 3.5 g          |
| pH                    | 5.8            |

|                     |                |
|---------------------|----------------|
| <b>Medium B</b>     | <b>1 liter</b> |
| MS modif. No 4      | 2.7 g          |
| Vitamins NN stock   | 0.1 ml         |
| Casein hydrolysate  | 100 mg         |
| NAA Soluble in EtOH | 2 mg           |
| BAP Soluble in MeOH | 0.5 mg         |
| pH                  | 5.8            |

|                               |               |
|-------------------------------|---------------|
| <b>Medium C</b>               | <b>500 ml</b> |
| Macro stock                   | 5 ml          |
| CaCl <sub>2</sub> stock (2 M) | 1.5 ml        |
| Iron stock                    | 5 ml          |
| Micro stock                   | 500 µl        |
| Vit mix 1 stock               | 2.5 ml        |
| Vit mix 2 stock               | 2.5 ml        |
| Vit mix 3 stock               | 2.5 ml        |
| Sugars stock                  | 10 ml         |
| Organic acids stock           | 5 ml          |
| Casein hydrolysate            | 250 mg        |
| Glucose 0.2 M                 | 18.5 g        |
| Mannitol 0.2M                 | 18.5 g        |
| PVP 10                        | 10 g          |
| NAA Soluble in EtOH           | 0.5 mg        |
| BAP Soluble in MeOH           | 0.2 mg        |
| Cellulase RS                  | 5 g           |
| Macerozyme                    | 1.5 g         |
| pH                            | 5.6           |

|                               |                |
|-------------------------------|----------------|
| <b>Medium E</b>               | <b>1 liter</b> |
| Macro stock                   | 10 ml          |
| CaCl <sub>2</sub> stock (2 M) | 1.25 ml        |
| Iron stock                    | 10 ml          |
| Micro stock                   | 1 ml           |
| Vit. Mix 1 stock              | 5 ml           |
| Vit. Mix 2 stock              | 5 ml           |
| Vit. Mix 3 stock              | 5 ml           |
| Sugars stock                  | 20 ml          |
| Organic acids stock           | 10 ml          |

|                    |         |
|--------------------|---------|
| Casein hydrolysate | 500 mg  |
| Glucose            | 33,7 g  |
| Mannitol           | 30,92 g |
| BSA                | 1 g     |
| NAA                | 1 mg    |
| BAP                | 0.4 mg  |
| pH                 | 5.6     |

|                    |                |
|--------------------|----------------|
| <b>Medium F</b>    | <b>1 liter</b> |
| MS modif. No 4     | 2,70 g         |
| NH <sub>4</sub> Cl | 107 mg         |
| Vit. NN stock      | 1 ml           |
| Adenine sulphate   | 40 mg          |
| Casein hydrolysate | 100 mg         |
| Sucrose            | 2.5 g          |
| Mannitol           | 54,7 g         |
| NAA                | 0.1 mg         |
| BAP                | 0.5 mg         |
| pH                 | 5.8            |

|                        |                |
|------------------------|----------------|
| <b>Medium G</b>        | <b>1 liter</b> |
| MS modif. No 4         | 2,70 g         |
| NH <sub>4</sub> Cl     | 267.5 mg       |
| Vit. NN stock          | 1 ml           |
| Adenine (hemi)sulphate | 80 mg          |
| Casein hydrolysate     | 100 mg         |
| Sucrose                | 2.5 g          |
| Mannitol               | 36,4 g         |
| IAA                    | 0.1 mg         |
| Zeatin                 | 2.5 mg         |
| pH                     | 5.8            |

|                       |                |
|-----------------------|----------------|
| <b>Medium H</b>       | <b>1 liter</b> |
| MS salts and organics | 4,4 g          |
| Sucrose               | 10 g           |
| Vit. NN stock         | 1 ml           |
| NAA                   | 0.01 mg        |
| Zeatin                | 2.0 mg         |
| GA <sub>3</sub>       | 0.1 mg         |
| pH                    | 5.8            |
| Gelrite               | 2.5 g          |

|                             |                |
|-----------------------------|----------------|
| <b>Plasmolysis solution</b> | <b>1 liter</b> |
| D-sorbitol                  | 91.1 g / 0.5 M |

|                       |                |
|-----------------------|----------------|
| <b>Wash solution*</b> | <b>1 liter</b> |
| Macro stock           | 10 ml          |

|                               |         |
|-------------------------------|---------|
| CaCl <sub>2</sub> stock (2 M) | 3 ml    |
| Iron stock                    | 10 ml   |
| Micro stock                   | 1 ml    |
| NaCl                          | 14.03 g |
| NAA                           | 2 mg    |
| BAP                           | 0.5 mg  |
| pH                            | 5.6     |

|                         |                |
|-------------------------|----------------|
| <b>Sucrose solution</b> | <b>1 liter</b> |
| Sucrose                 | 119.8 g        |

|                                       |               |
|---------------------------------------|---------------|
| <b>Transformation buffer 1</b>        | <b>500 ml</b> |
| Mannitol                              | 17.3 g        |
| CaCl <sub>2</sub> * 2H <sub>2</sub> O | 7.34 g        |
| MES                                   | 2.5 g         |
| pH                                    | 5.6           |

|                                       |               |
|---------------------------------------|---------------|
| <b>Transformation buffer 2</b>        | <b>500 ml</b> |
| Mannitol                              | 45.5 g        |
| MgCl <sub>2</sub> * 6H <sub>2</sub> O | 1.52 g        |
| MES                                   | 500 mg        |
| pH                                    | 5.6           |

|                                               |               |
|-----------------------------------------------|---------------|
| <b>PEG solution</b>                           | <b>100 ml</b> |
| PEG 4000                                      | 25g           |
| Mannitol stock (0.8 M)                        | 50 ml         |
| Ca(NO <sub>3</sub> ) <sub>2</sub> stock (2 M) | 5 ml          |

|                          |                |
|--------------------------|----------------|
| <b>Alginate solution</b> | <b>1 liter</b> |
| Alginic acid-Na salt     | 28 g           |
| D-sorbitol               | 72.88 g        |

|                                       |                |
|---------------------------------------|----------------|
| <b>Setting agar</b>                   | <b>1 liter</b> |
| Sorbitol                              | 72.88 g        |
| CaCl <sub>2</sub> * 2H <sub>2</sub> O | 7,351 g        |
| Phyto agar                            | 8 g            |

|                                       |                |
|---------------------------------------|----------------|
| <b>Floating solution</b>              | <b>1 liter</b> |
| Sorbitol                              | 72.88 g        |
| CaCl <sub>2</sub> * 2H <sub>2</sub> O | 7,351 g        |

|                           |                |
|---------------------------|----------------|
| <b>Releasing solution</b> | <b>1 liter</b> |
| Na-citrate                | 5.88 g         |
| Sorbitol                  | 91.1 g         |

### *Stocks solutions*

|                          |             |
|--------------------------|-------------|
| <b>Fluorescein stock</b> | <b>1 ml</b> |
| Fluoresceine diacetate   | 5 mg        |
| Acetone                  | 1 ml        |

|                                       |                |
|---------------------------------------|----------------|
| <b>Macro stock</b>                    | <b>1 liter</b> |
| KNO <sub>3</sub>                      | 74 g           |
| MgSO <sub>4</sub> , 7H <sub>2</sub> O | 49,2 g         |
| KH <sub>2</sub> PO <sub>4</sub>       | 3,4 g          |
| Store at 4°C                          |                |

|                                       |               |
|---------------------------------------|---------------|
| <b>Iron stock</b>                     | <b>100 ml</b> |
| Na <sub>2</sub> EDTA                  | 140 mg        |
| FeSO <sub>4</sub> , 7H <sub>2</sub> O | 190 mg        |
| Store at 4°C                          |               |

|                                                      |               |
|------------------------------------------------------|---------------|
| <b>Micro stock</b>                                   | <b>100 ml</b> |
| H <sub>3</sub> BO <sub>3</sub>                       | 150 mg        |
| MnSO <sub>4</sub> * H <sub>2</sub> O                 | 500 mg        |
| ZnSO <sub>4</sub> * 7H <sub>2</sub> O                | 100 mg        |
| Na <sub>2</sub> MoO <sub>4</sub> * 2H <sub>2</sub> O | 12 mg         |
| CuSO <sub>4</sub> * 5H <sub>2</sub> O                | 1,2 mg        |
| CoCl <sub>2</sub> * 6H <sub>2</sub> O                | 1.2 mg        |
| KI                                                   | 38 mg         |
| Store at 4°C                                         |               |

|                          |              |
|--------------------------|--------------|
| <b>Vitamins NN stock</b> | <b>50 ml</b> |
| Glycine                  | 100 mg       |
| Myo-Inositol             | 5000 mg      |
| Thiamine-HCl             | 25 mg        |
| Pyridoxine-HCl           | 25 mg        |
| Nicotinic acid           | 250 mg       |
| Folic acid               | 25 mg        |
| Biotin                   | 2.5 mg       |
| Store at -20°C           |              |

|                             |               |
|-----------------------------|---------------|
| <b>Vit. mix 1 stock</b>     | <b>100 ml</b> |
| Pantothenic acid            | 50 mg         |
| Choline chloride            | 50 mg         |
| Ascorbic acid               | 100 mg        |
| p-Aminobenzoic acid         | 1ml           |
| Nicotinic acid              | 50 mg         |
| Pyridoxine-HCl (Vitamin B6) | 50 mg         |
| Thiamine-HCl                | 500 mg        |
| Store at -20°C              |               |

|                              |               |
|------------------------------|---------------|
| <b>Vit. mix 2 stock</b>      | <b>100 ml</b> |
| Folic acid                   | 20 mg         |
| Biotin – H1 vit              | 0.5 mg        |
| Cyanocobalamin – B12 vitamin | 1 mg          |
| Store at -20°C               |               |

|                              |               |
|------------------------------|---------------|
| <b>Vit. mix 3 stock</b>      | <b>100 ml</b> |
| Cholecalciferol – D3 vitamin | 0.5 mg        |
| Store at -20°C               |               |

|                          |               |
|--------------------------|---------------|
| <b>Sugars stock</b>      | <b>100 ml</b> |
| Sorbitol                 | 625 mg        |
| Sucrose                  | 625 mg        |
| D(-)Fructose             | 625 mg        |
| D(-)Ribose               | 625 mg        |
| D(+)Xylose               | 625 mg        |
| D(+)Mannose              | 625 mg        |
| L(+)Rhamnose monohydrate | 625 mg        |
| D(+)Cellobiose           | 625 mg        |
| Myo-Inositol             | 250 mg        |
| Store at 4°C             |               |

|                            |               |
|----------------------------|---------------|
| <b>Organic acids stock</b> | <b>100 ml</b> |
| Pyruvic acid               | 100 mg        |
| Fumaric acid               | 200 mg        |
| Citric acid monohydrate    | 200 mg        |
| L-Malic acid               | 200 mg        |
| Store at 4°C               |               |

# GOI cDNA sequence (1854 bp)

(from 1-856 bp)

ATGGAGCAAGAGATGGCGGAGTATCTTCCTTTAGATCGAGGATCTAAACGGAGGATTACAGAGAAGCAAACCTCTTCACATTCTTCTCCGATTCCAATTAAGTAG  
TACCTCGTTCTCTACCGCCTCATAGAAGGAAATCTAGCTCCTAGATTTTGCTCCTAAGTCTCTTCGTTTGAAGAAGTGAAGAAGAGGCTAAGGTTAATTTTCATC

gRNA\_1

Exon1

10 20 30 40 50 60 70 80 90 100

AAAAAAGGGTGGATTTATTACCATGCCTTTTATCATAGCAAATGAGGCACTGGAGAGTGTGGCGAGCTATGGACTTTTACCAAATATGACAAATTATCTGATGGGAC  
TTTTTCCCACCTAAATAATGGTACGGAAAATAGTATCGTTTACTCCGTGACCTCTCACACCGCTCGATACCTGAAAATGGTTTATACTGTTTAATAGACTACCTG

Exon1

Exon2

110 120 130 140 150 160 170 180 190 200 210

AATACAGGATGGGGTTTACTACTGCTCAAAATCTTCTGTTTTCTGGTCAGCTACTACCAATTTTTGCCTATTGTTGGAGCTGTTGTTGCTGATTCAATTTAGGT  
TTATGTCTACCCCAATGATGACGAGTTTTAGAAGACAAAAGACCAGTCGATGATGGTTAAAAACGGATAACAACCTCGACAACAACGACTAAGTATAAATCCA

gRNA\_3

Exon2

220 230 240 250 260 270 280 290 300 310 320

CGATTCTTACTATTGGCCTTGGTTCCATCTTCAGTTTCTGGGATCAACAGTGTGTGGTTAACAGCAATGATTCCGAAAGCCAGGCCTCCGCCTTGCAATCAAAC  
GCTAAGGAATGATAACCGGAACCAAGGTAGAAGTCAAAGGACCCTAGTTGTCAACAACCAATTGTCGTTACTAAGGCTTTCGGTCCGGAGGCGGAACGTTAGTTTG

Exon2

Exon3

330 340 350 360 370 380 390 400 410 420

AGGACAGGCTTGTAATTCTACAACGGGACCACAATACATGCTCTTGTTTTCTCGTTTCTGCTCTTGTCGAATTGGTGCTGGAGGTATAAGACCATGTTCTTTAGCCT  
TCCTGTCCGAACATTAAGATGTTGCCCTGGTGTATGTACGAGAACCAAAAGAGCAAAGACGAGAACAGTTAACCACGACCTCCATATTCTGGTACAAGAAATCGGA

gRNA\_4

Exon3

430 440 450 460 470 480 490 500 510 520 530

TTGGTGCAAACCAAGTTTGACAAGGGAGGTAGCGATCCCAACAAACAGACAGTGTGGAGAGCTTCTTTGCCTGGTATTATACTTCATCTGTAGTCTCTGTTCTGATT  
AACCACGTTTGGTCAAACCTGTTCCCTCCATCGCTAGGGTTGTTGTCTGTCAACCTCTCGAAGAAACGGACCATAATATGAAGTAGACATCAGAGACAAGACTAA

Exon3

540 550 560 570 580 590 600 610 620 630 640

GCCCTAACGGGTATCGTTTACCTTCAAGACAGACTTGGGTGAAAAATAGGTTTTGGAGTTCCTGCAATTCTCATGTTCTTATCCGCGTTGTTTTCTTCTTGCTTC  
CGGGATTGCCCATAGCAAATGGAAGTTCTGTCTGAACCCACCTTTTATCCAAACCTCAAGGACGTTAAGAGTACAAGAATAGGCGCAACAAAAAGAAGGAACGAAG

Exon3

650 660 670 680 690 700 710 720 730 740

TCCGTTTTATATCAAGCCAAAGGTTTCGCTCAAATGTGTTTGCCAGCTTTATACGAGTAATTGTGGTTGCCTTCAAGAATAGGAACTACATTACCCCAATCAGAACT  
AGGCAAAATATAGTTTCGGTTTTCCAAGCGAGTTTACACAAACGGTCGAAATATGCTCATTAAACACCAACGGAAGTTCTTATCCTTTGATGTAATGGGGTTAGTCTTGA

Exon3

750 760 770 780 790 800 810 820 830 840 850

GOI cDNA sequence (1854 bp) (from 857-1712 bp)

CTGATTATCATCACAAGAATGGTTCAGGACCTCAAGTGCCAACGGAGAAATTGAGATTCTTAAACAAAGCTTGCATCATTTAAAGCCCTGAAGATGTTAATCCAAAC  
GACTAATAGTAGTGTCTTACCAAGTCTGGAGTTCACGGTTGCCTCTTAACTCTAAGAATTTGTTTCGAACGTAGTAATTTTCGGGACTTCTACAATTAGGTTTG

gRNA\_5

Exon3

860 870 880 890 900 910 920 930 940 950 960

GGAGTTGCAGCCAATCCATGGAACCTTTGCACAGTGGAGCAAGTTGAGGAGCTAAAAGCCCTCGTTAGAATCGTGCCATTGTGGTCAACAGGGATCATGATATCAAT  
CCTCAACGTCGGTTAGGTACCTTGAAACGTGTACCTCGTTCAACTCCTCGATTTTCGGGAGCAATCTTAGCACGGTAACACCAAGTTGTCCTTAGTACTATAGTTA

Exon3

970 980 990 1,000 1,010 1,020 1,030 1,040 1,050 1,060 1,070

AAACTTGAGCCAAAGTTCATTCCCACTACTACAAGTCTAATCCATGAATAGACATCTAACTAAAGGATTCCAAATTCAGCAGGGTCATTGCGGATGTTTTTGATGA  
TTTGAACCTCGTTTTCAAGTAAGGGTGATGATGTTTCGAGTTAGGTACTTATCTGTAGATTTCCTAAGGTTAAGGTCGTCCAGTAAGCCCTACAAAACTACT

Exon3

1,080 1,090 1,100 1,110 1,120 1,130 1,140 1,150 1,160 1,170

TTGCATTAACAATTTGGGTATTACTGTATGACCGCGTGATGCTTCCATTGGCATCAAAGATCAAAGGAAGACCAGTTCGTCTAAAACCTATAGTCAGAATGGGACTT  
AACGTAATTGTTAAACCCATAATGACATACTGGCGCACTACGAAGTAACCGTAGTTTCTAGTTTCCTTCTGGTCAAGCAGATTTTGGATATCAGTCTTACCTGAA

Exon3

1,180 1,190 1,200 1,210 1,220 1,230 1,240 1,250 1,260 1,270 1,280

GGTATATTCGTGTCTTGCATGTCCATGGTAGTCTCTGGTATTATCGAAAATATTTCGACGAAGAAGAGCAATCAGTGAAGGGCTGTTGAACAACTCGCAGGGGTTGGT  
CCATATAAGCACAGAACGTACAGGTACCATCAGAGACCATAATAGCTTTTATAAGCTGCTTCTTCTCGTTAGTCACTTCCCACAACCTGTTGAGCGTCCCCAACCA

Exon3

1,290 1,300 1,310 1,320 1,330 1,340 1,350 1,360 1,370 1,380 1,390

GGAGATGTCAGCAATGTGGCTCATTATACCAACAGTTTAAACGGTATAGCAGAGGCGTTGAACGCGATTGGCGCCACAGAGTTCTATTATTTCAGAGCTCCCAAAGA  
CCTCTACAGTCGTTACACCGAGTAATATGGTTTTGTCAAATTTGCCATATCGTCTCCGCAACTTGCGCTAACC GCGGTGTCTCAAGATAATAAGTCTCGAGGGTTTCT

Exon3

1,400 1,410 1,420 1,430 1,440 1,450 1,460 1,470 1,480 1,490

GTATGTCAAGTATTGCATCAGCTCTTTTAGGACTGGGAATGGCAGTTGCAAATCTTTTAGCAAGTGTTGTTTTGAGTGCTGTGGATAAGTACACGAAAGGAGAAGGG  
CATACAGTTCATAACGTAGTCGAGAAAATCCTGACCCTTACCGTCAACGTTTAGAAAATCGTTCACAACAAAACCTACGACACCTATTCATGTGCTTTCCTCTCCC

Exon3

1,500 1,510 1,520 1,530 1,540 1,550 1,560 1,570 1,580 1,590 1,600

AAAGAAAGTTGGATTTCAAGCAATATCAACAGGGGACACTATGAGTATTACTACTGGCTTCTTGCTCTAATGACAGGTTTTAATCTGCTTTATTTTGTGGTTTGTG  
TTTCTTTCAACCTAAAGTTCGTTATAGTTGTCCCTGTGATACTCATAATGATGACCGAAGAACGAGATTACTGTCCAAAATTAGACGAAATAAAACACCAACAAC

Exon3

1,610 1,620 1,630 1,640 1,650 1,660 1,670 1,680 1,690 1,700 1,710



**GOI cDNA sequence (1854 bp) (from 1713-1854 bp)**

CTGGCAATATGGACCTTCTGTTGATGTTGACATCACTATGAGAATGATGGAACCTAGCGACGATGAAGATGACGATGACGATGAAGATAAAGATGATTTGCCTAAGA  
GACCGTTATACCTGGAAGACAACCTACAACCTGTAGTGATACTCTTACTACCTTGGATCGCTGCTACTTCTACTGCTACTGCTACTTCTATTTCTACTAAACGGATTCT

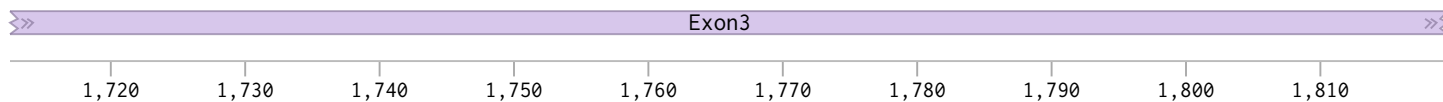

AGAATAAATCTACACCTGACTTGAATTCCTGCTAG  
TCTTATTTAGATGTGGACTGAACTTAAGGACGATC

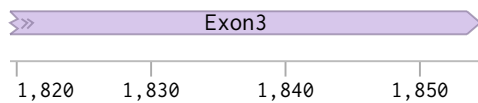

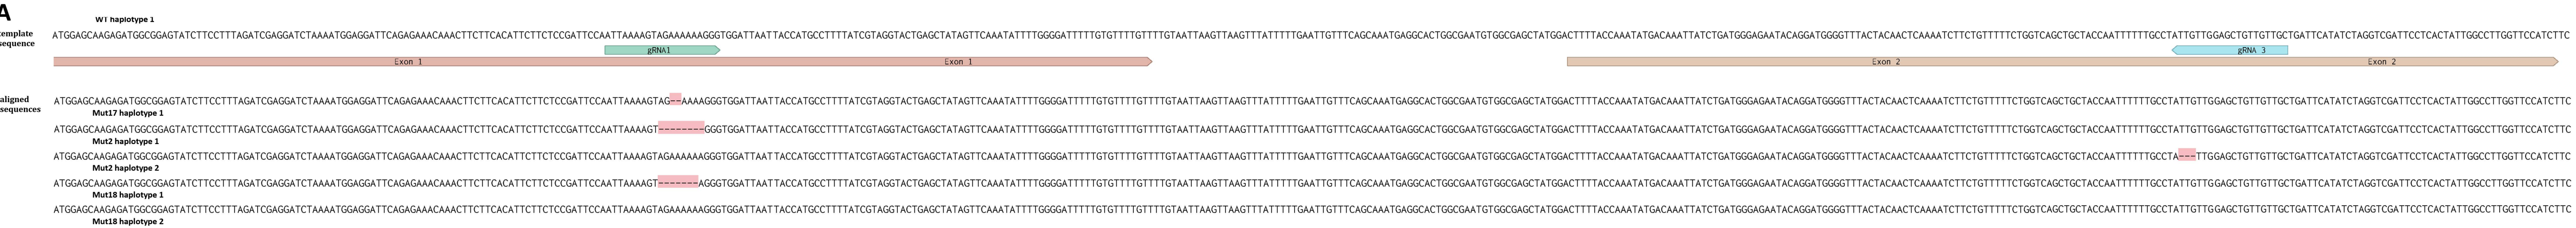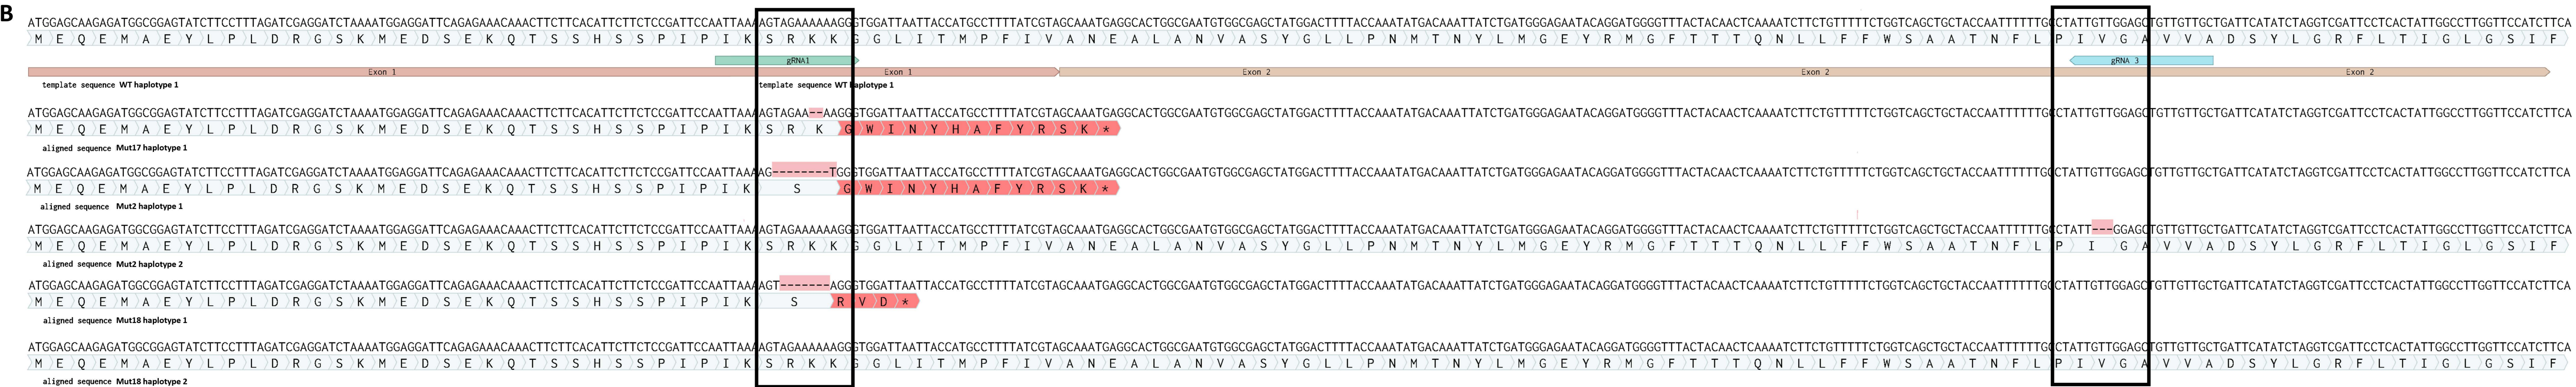

Supplement: s1 [file s1]
